# Supplementary material for: A Statewise Statistical Analysis on Covid19 Cases in India at Different Temperature
Source: Research Square preprint supplement (doi:10.21203/rs.3.rs-121252/v2), 2020-12-21
Supplement: Supplementary file 1 [file 47d041c962f067a43e5c97a4.docx]

**CHART – I**

**CHART – II**

**CHART – III**

**CHART – IV**

**CHART – V**

**CHART – VI ( 3 )**

**CHART – VII ( 3 )**
